# Supplementary material
Source: PubMed Central journal article supplement (PMC9358739)

**Table S1.** Details of the specimens/scans used in the study.

| Family                                  | Species                                         | ID                                                          | Origin | Voxel size (μm) |
|-----------------------------------------|-------------------------------------------------|-------------------------------------------------------------|--------|-----------------|
| Rhinatremaidae                          | <i>Epicrionops bicolor</i>                      | Epicrionops bicolor lsumz:herps:27295                       | MS     | 13.14           |
|                                         | <i>Rhinatrema bivittatum</i> <sup>†</sup>       | Rhinatrema bivittatum byu:main:48675                        | MS     | 12.81           |
|                                         | <i>Rhinatrema bivittatum</i> <sup>*</sup>       | Rhinatrema bivittatum A53                                   | AH     | 31.72           |
|                                         | <i>Rhinatrema bivittatum</i> <sup>*†</sup>      | Rhinatrema bivittatum AL8                                   | AH     | 31.72           |
|                                         | <i>Rhinatrema bivittatum</i> <sup>*</sup>       | Rhinatrema bivittatum B75                                   | AH     | 33.07           |
|                                         | <i>Rhinatrema bivittatum</i> <sup>*</sup>       | Rhinatrema bivittatum B80                                   | AH     | 28.34           |
| Ichthyophiidae                          | <i>Ichthyophis bombayensis</i> <sup>†</sup>     | Ichthyophis bombayensis uf:herp:76734                       | MS     | 15.72           |
|                                         | <i>Ichthyophis kohtaoensis</i>                  | Ichthyophis kohtaoensis ncsm:herp:79205                     | MS     | 18.01           |
|                                         | <i>Ichthyophis kohtaoensis</i> <sup>†</sup>     | Ichthyophis kohtaoensis ZMH A08981                          | ZMH    | 6.83            |
|                                         | <i>Ichthyophis kohtaoensis</i> <sup>*</sup>     | Ichthyophis kohtaoensis 218831                              | UMMZ   | 31.72           |
|                                         | <i>Ichthyophis kohtaoensis</i> <sup>*</sup>     | Ichthyophis kohtaoensis 218832                              | UMMZ   | 31.72           |
|                                         | <i>Uraeotyphlus oxyurus</i> <sup>†</sup>        | Uraeotyphlus oxyurus uf:herp:62870                          | MS     | 15.41           |
| Scolecomorphidae                        | <i>Scolecomorphus kirkii</i>                    | Scolecomorphus kirkii 101889                                | RMCA   | 19.01           |
|                                         | <i>Scolecomorphus uluguruensis</i>              | Scolecomorphus uluguruensis 11102                           | RMCA   | 20.99           |
|                                         | <i>Scolecomorphus uluguruensis</i>              | Scolecomorphus uluguruensis 101890                          | RMCA   | 17.03           |
|                                         | <i>Scolecomorphus uluguruensis</i>              | Scolecomorphus uluguruensis 101891                          | RMCA   | 20.99           |
|                                         | <i>Scolecomorphus uluguruensis</i>              | Scolecomorphus uluguruensis 101892                          | RMCA   | 20.81           |
|                                         | <i>Scolecomorphus uluguruensis</i>              | Scolecomorphus uluguruensis 101894                          | RMCA   | 20.99           |
|                                         | <i>Scolecomorphus uluguruensis</i> <sup>†</sup> | Scolecomorphus uluguruensis 101896                          | RMCA   | 15.86           |
| Herpeliidae                             | <i>Boulengerula boulengeri</i>                  | Boulengerula boulengeri fmnh:amphibians and reptiles:251369 | MS     | 23.74           |
|                                         | <i>Boulengerula fischeri</i> <sup>*</sup>       | Boulengerula fischeri 3                                     | AH     | 32.48           |
|                                         | <i>Boulengerula fischeri</i> <sup>*</sup>       | Boulengerula fischeri 4                                     | AH     | 32.48           |
|                                         | <i>Boulengerula fischeri</i> <sup>*</sup>       | Boulengerula fischeri 5                                     | AH     | 32.48           |
|                                         | <i>Boulengerula fischeri</i> <sup>*</sup>       | Boulengerula fischeri 7                                     | AH     | 32.48           |
|                                         | <i>Boulengerula fischeri</i> <sup>**†</sup>     | Boulengerula fischeri AH1                                   | AH     | 9.74            |
|                                         | <i>Boulengerula taitanus</i> <sup>*†</sup>      | Boulengerula taitanus AH2                                   | AH     | 16.07           |
|                                         | <i>Boulengerula taitanus</i> <sup>*</sup>       | Boulengerula taitanus AL010401                              | AH     | 31.72           |
|                                         | <i>Boulengerula taitanus</i> <sup>*†</sup>      | Boulengerula taitanus AL010402                              | AH     | 9.74            |
|                                         | <i>Boulengerula taitanus</i> <sup>*</sup>       | Boulengerula taitanus JM01452                               | AH     | 33.07           |
|                                         | <i>Boulengerula taitanus</i> <sup>*</sup>       | Boulengerula taitanus JM01584                               | AH     | 33.07           |
| <i>Herpele squalostoma</i> <sup>*</sup> | Herpele squalostoma AL10                        | AH                                                          | 34.37  |                 |

|                |                                      |                                             |      |       |
|----------------|--------------------------------------|---------------------------------------------|------|-------|
|                | <i>Herpele squalostoma*</i>          | Herpele squalostoma AL2                     | AH   | 31.72 |
|                | <i>Herpele squalostoma*</i>          | Herpele squalostoma AL30                    | AH   | 31.72 |
|                | <i>Herpele squalostoma*</i>          | Herpele squalostoma AL31                    | AH   | 34.35 |
|                | <i>Herpele squalostoma*</i>          | Herpele squalostoma AL32                    | AH   | 32.48 |
| Caeciliidae    | <i>Caecilia museugoeldi*</i>         | Caecilia museugoeldi V2101                  | NHM  | 63.47 |
|                | <i>Caecilia tentaculata*</i>         | Caecilia tentaculata 3955                   | NHM  | 90.83 |
|                | <i>Caecilia tentaculata</i>          | Caecilia tentaculata ku:kuh:175441          | MS   | 77.33 |
| Typhlonectidae | <i>Atretochoana eiselti†</i>         | Atretochoana eiselti 30919                  | AH   | 19.98 |
|                | <i>Atretochoana eiselti</i>          | Atretochoana eiselti uf:herp:185560         | MS   | 29    |
|                | <i>Potomotyphlus kaupii†</i>         | Potomotyphlus kaupii PotomoH2_01_b          | NHM  | 9.71  |
|                | <i>Potomotyphlus kaupii†</i>         | Potomotyphlus kaupii PotomoH2_01_s          | NHM  | 9.71  |
|                | <i>Typhlonectes compressicauda†</i>  | Typhlonectes compressicauda 11307           | NHM  | 8.4   |
|                | <i>Typhlonectes compressicauda</i>   | Typhlonectes compressicauda cas:herp:125421 | MS   | 36.87 |
|                | <i>Typhlonectes compressicauda*</i>  | Typhlonectes compressicauda AL20            | AH   | 17.65 |
|                | <i>Typhlonectes compressicauda*</i>  | Typhlonectes compressicauda AL6             | AH   | 49.37 |
|                | <i>Typhlonectes compressicauda*†</i> | Typhlonectes compressicauda AL7             | AH   | 46.81 |
|                | <i>Typhlonectes natans*</i>          | Typhlonectes natans SMNS16297               | SMNS | 55    |
|                | <i>Typhlonectes natans†</i>          | Typhlonectes natans ZMH A08984              | ZMH  | 3.89  |
| Indotyphlidae  | <i>Gegeneophis ramaswamii†</i>       | Gegeneophis ramaswamii 151                  | NHM  | 6.52  |
|                | <i>Gegeneophis ramaswamii†</i>       | Gegeneophis ramaswamii 616                  | NHM  | 6.57  |
|                | <i>Gegeneophis ramaswamii†</i>       | Gegeneophis ramaswamii 654                  | NHM  | 6.57  |
|                | <i>Gegeneophis ramaswamii†</i>       | Gegeneophis ramaswamii 1275                 | NHM  | 8.5   |
|                | <i>Grandisonia alternans</i>         | Grandisonia alternans 109185                | RMCA | 20.3  |
|                | <i>Grandisonia alternans</i>         | Grandisonia alternans 109186                | RMCA | 20    |
|                | <i>Grandisonia alternans†</i>        | Grandisonia alternans 109187                | RMCA | 24.16 |
|                | <i>Grandisonia alternans</i>         | Grandisonia alternans cas:herp:157086       | MS   | 44.98 |
|                | <i>Hypogeophis rostratus</i>         | Hypogeophis rostratus 73_38_B_101           | RMCA | 20.99 |
|                | <i>Hypogeophis rostratus</i>         | Hypogeophis rostratus 73_38_B_110           | RMCA | 20.99 |
|                | <i>Hypogeophis rostratus</i>         | Hypogeophis rostratus 73_38_B_111           | RMCA | 25.94 |
|                | <i>Hypogeophis rostratus†</i>        | Hypogeophis rostratus 73_48_B_1             | RMCA | 19.01 |
|                | <i>Sylvacaecilia grandisonae</i>     | Sylvacaecilia grandisonae ummz:herps:227904 | MS   | 13.5  |
| Siphonopidae   | <i>Microcaecilia unicolor†</i>       | Microcaecilia unicolor MU1                  | NHM  | 7.23  |
|                | <i>Microcaecilia unicolor*</i>       | Microcaecilia unicolor prey                 | AH   | 22.93 |

|              |                                             |                                         |       |       |
|--------------|---------------------------------------------|-----------------------------------------|-------|-------|
|              | <i>Mimosiphonops vermiculatus</i>           | Mimosiphonops vermiculatus ku:kuh:93271 | MS    | 16.02 |
|              | <i>Siphonops annulatus</i>                  | Siphonops annulatus cas:herp:74304      | MS    | 22.17 |
|              | <i>Siphonops annulatus</i> <sup>†</sup>     | Siphonops annulatus 1924_9_20_9_Red0    | NHM   | 9.82  |
|              | <i>Siphonops annulatus</i> <sup>†</sup>     | Siphonops annulatus ZMH A00235          | ZMH   | 9.2   |
| Dermophiidae | <i>Dermophis mexicanus</i>                  | Dermophis mexicanus cas:herp:144523     | MS    | 50.79 |
|              | <i>Dermophis mexicanus</i> *                | Dermophis mexicanus A-52188             | UTACV | 56.04 |
|              | <i>Dermophis mexicanus</i> *                | Dermophis mexicanus AL2101201           | AL    | 88.52 |
|              | <i>Dermophis mexicanus</i> *                | Dermophis mexicanus AL2101202           | AL    | 93.79 |
|              | <i>Geotrypetes seraphini</i> * <sup>†</sup> | Geotrypetes seraphini AL29041901        | AL    | 49.37 |
|              | <i>Geotrypetes seraphini</i> *              | Geotrypetes seraphini 2                 | AH    | 49.37 |
|              | <i>Geotrypetes seraphini</i> * <sup>†</sup> | Geotrypetes seraphini 6                 | AH    | 15.17 |
|              | <i>Geotrypetes seraphini</i> *              | Geotrypetes seraphini AL1               | AH    | 16    |
|              | <i>Geotrypetes seraphini</i> *              | Geotrypetes seraphini AL21              | AH    | 56.62 |
|              | <i>Geotrypetes seraphini</i> *              | Geotrypetes seraphini AL5               | AH    | 35.94 |
|              | <i>Schistometopum gregorii</i>              | Schistometopum gregorii cas:herp:245198 | MS    | 38.66 |
|              | <i>Schistometopum thomense</i> *            | Schistometopum thomense 6               | AH    | 32.48 |
|              | <i>Schistometopum thomense</i> *            | Schistometopum thomense 7               | AH    | 32.48 |
|              | <i>Schistometopum thomense</i> *            | Schistometopum thomense #8              | AH    | 32.48 |
|              | <i>Schistometopum thomense</i> *            | Schistometopum thomense AL11            | AH    | 32.48 |

\*Specimens scanned using the HECTOR micro computed tomography ( $\mu$ CT) scanner

<sup>†</sup>Specimens for which only the atlas was available

Abbreviations are as follows:

- Personal collection of Anthony Herrel (AH)
- Personal collection of Aurélien Lowie (AL)
- Morphosource.org (MS)
- Natural History Museum, London (NHM)
- Royal Museum of Central Africa (RMCA)
- Staatliches Museum für Naturkunde Stuttgart (SMNS)
- University of Michigan, Museum of Zoology (UMMZ)
- University of Texas Arlington, Amphibian & Reptile Diversity Research Center (UTACV)
- Zoological Museum, Hamburg (ZMH)

**Table S2.** Definition of the landmarks of the atlas used in geometric morphometric analyses.

| Left side | Right side | Region    | Definition                                                                   |
|-----------|------------|-----------|------------------------------------------------------------------------------|
| 1         | 1          | Posterior | Mid point of the neural arch                                                 |
| 2         | 2          | Posterior | Mid point of the dorsal side of the cotyle                                   |
| 3         | 3          | Posterior | Mid point of the ventral side of the cotyle                                  |
| 4         | 5          | Posterior | Posterior extreme of the postzygapophyses                                    |
| 6         | 7          | Posterior | Junction between the neural arch and the cotyle                              |
| 8         | 8          | Anterior  | Mid point of the neural arch                                                 |
| 9         | 9          | Anterior  | Most dorsal point of the atlantal cotyles junction                           |
| 10        | 10         | Anterior  | Most ventral point of the atlantal cotyles junction                          |
| 12        | 11         | Anterior  | Junction between the neural arch and the atlantal cotyle                     |
| 14        | 13         | Anterior  | Anterolateral extreme of the atlantal cotyle                                 |
| 15        | 16         | Lateral   | Inflection point on the junction between the postzygapophyses and the cotyle |
| 17        | 18         | Lateral   | Junction between the neural arch and the atlantal cotyle                     |
| 19        | 19         | Dorsal    | Mid point on the dorsal line of the neural arch                              |

**Table S3.** Definition of the landmarks of the vertebrae used in geometric morphometric analyses.

| Left side | Right side | Region    | Definition                                                                   |
|-----------|------------|-----------|------------------------------------------------------------------------------|
| 1         | 1          | Posterior | Mid point of the neural arch                                                 |
| 2         | 2          | Posterior | Mid point of the dorsal side of the cotyle                                   |
| 3         | 3          | Posterior | Mid point of the ventral side of the cotyle                                  |
| 4         | 5          | Posterior | Posterior extreme of the postzygapophyses                                    |
| 6         | 7          | Posterior | Junction between the neural arch and the cotyle                              |
| 8         | 8          | Anterior  | Mid point of the neural arch                                                 |
| 9         | 9          | Anterior  | Most dorsal point of the atlantal cotyles junction                           |
| 10        | 10         | Anterior  | Most ventral point of the atlantal cotyles junction                          |
| 12        | 11         | Anterior  | Anterior extreme of the prezygapophyses                                      |
| 14        | 13         | Anterior  | Junction between the neural arch and the atlantal cotyle                     |
| 16        | 15         | Anterior  | Anterior extreme of the basapophyseal processes                              |
| 17        | 18         | Lateral   | Inflection point on the junction between the postzygapophyses and the cotyle |
| 19        | 19         | Dorsal    | Mid point on the dorsal line of the neural arch                              |
| 20        | 22         | Lateral   | Mid point between the zygapophyses                                           |
| 21        | 21         | Ventral   | Mid point on the hypapophyseal keel                                          |

**Figure S1.** Landmarks used in our analyses to quantify shape variation of the Atlas. From left to right: caudal view, left lateral view, frontal view. Red circles represent homologous landmarks. For clarity, only the left side of the cranium is labelled. Shown on *Geotrypetes seraphini*. See supplementary table 2 for a complete description of the landmarks.

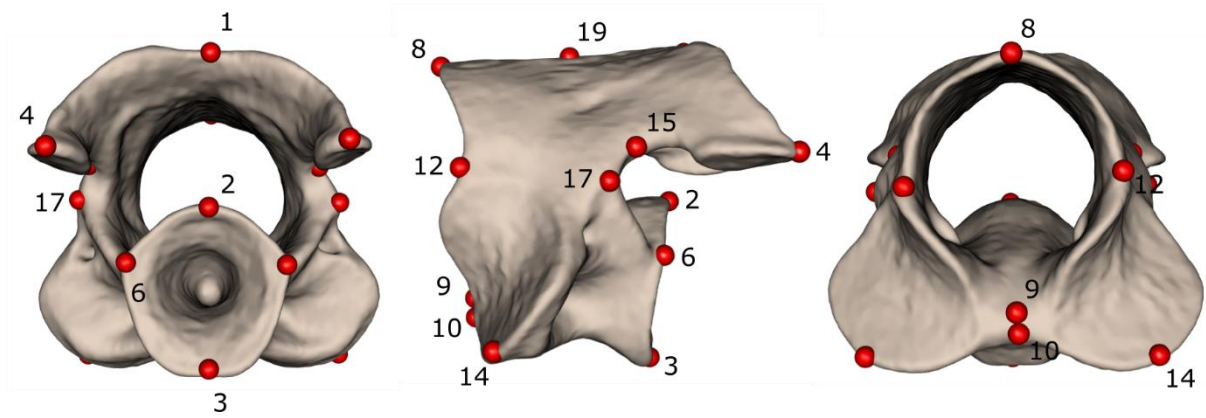

**Figure S2.** Landmarks used in our analyses to quantify shape variation of the vertebrae. From left to right: caudal view, left lateral view, frontal view. Red circles represent homologous landmarks. For clarity, only the left side of the cranium is labelled. Shown on *Geotrypetes seraphini*. See supplementary table 3 for a complete description of the landmarks.

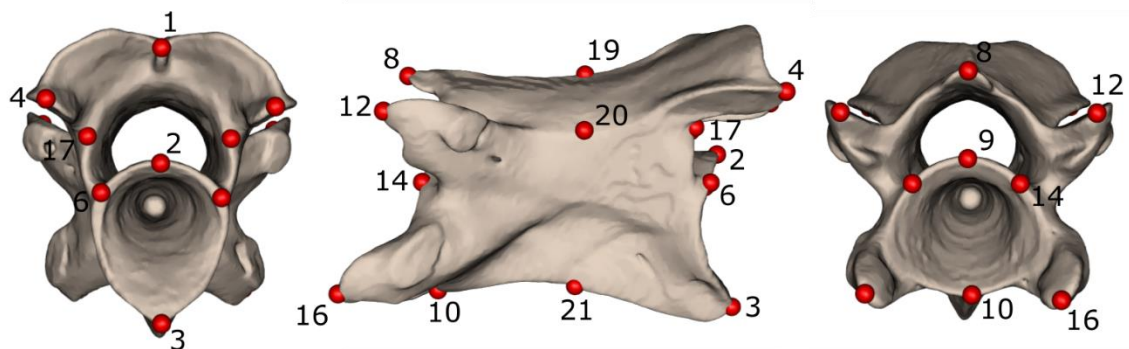

**Figure S3.** Maximum credibility tree used in our analyses.

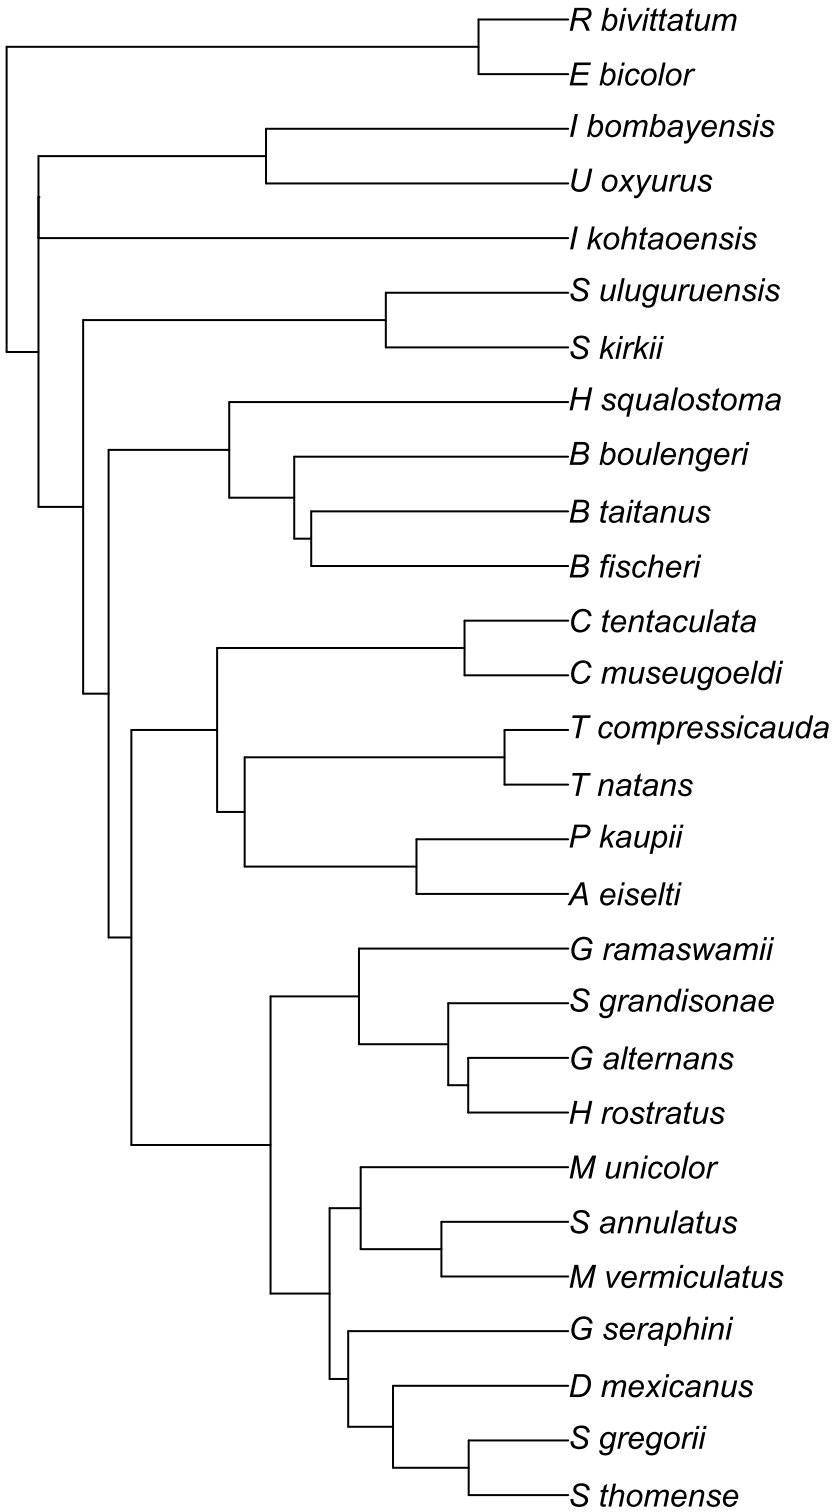

**Figure S4.** Scatterplot of the results of the canonical variate analysis discriminating the vertebral groups of caecilian amphibians not including the atlas (n=285). Circles represent species means (n=120) and are colored by vertebral position. Surfaces represent the mean shapes associated with each group of vertebrae. From top to bottom: lateral, dorsal, ventral, proximal, distal view. See figure 1 for complete legend of the vertebrae.

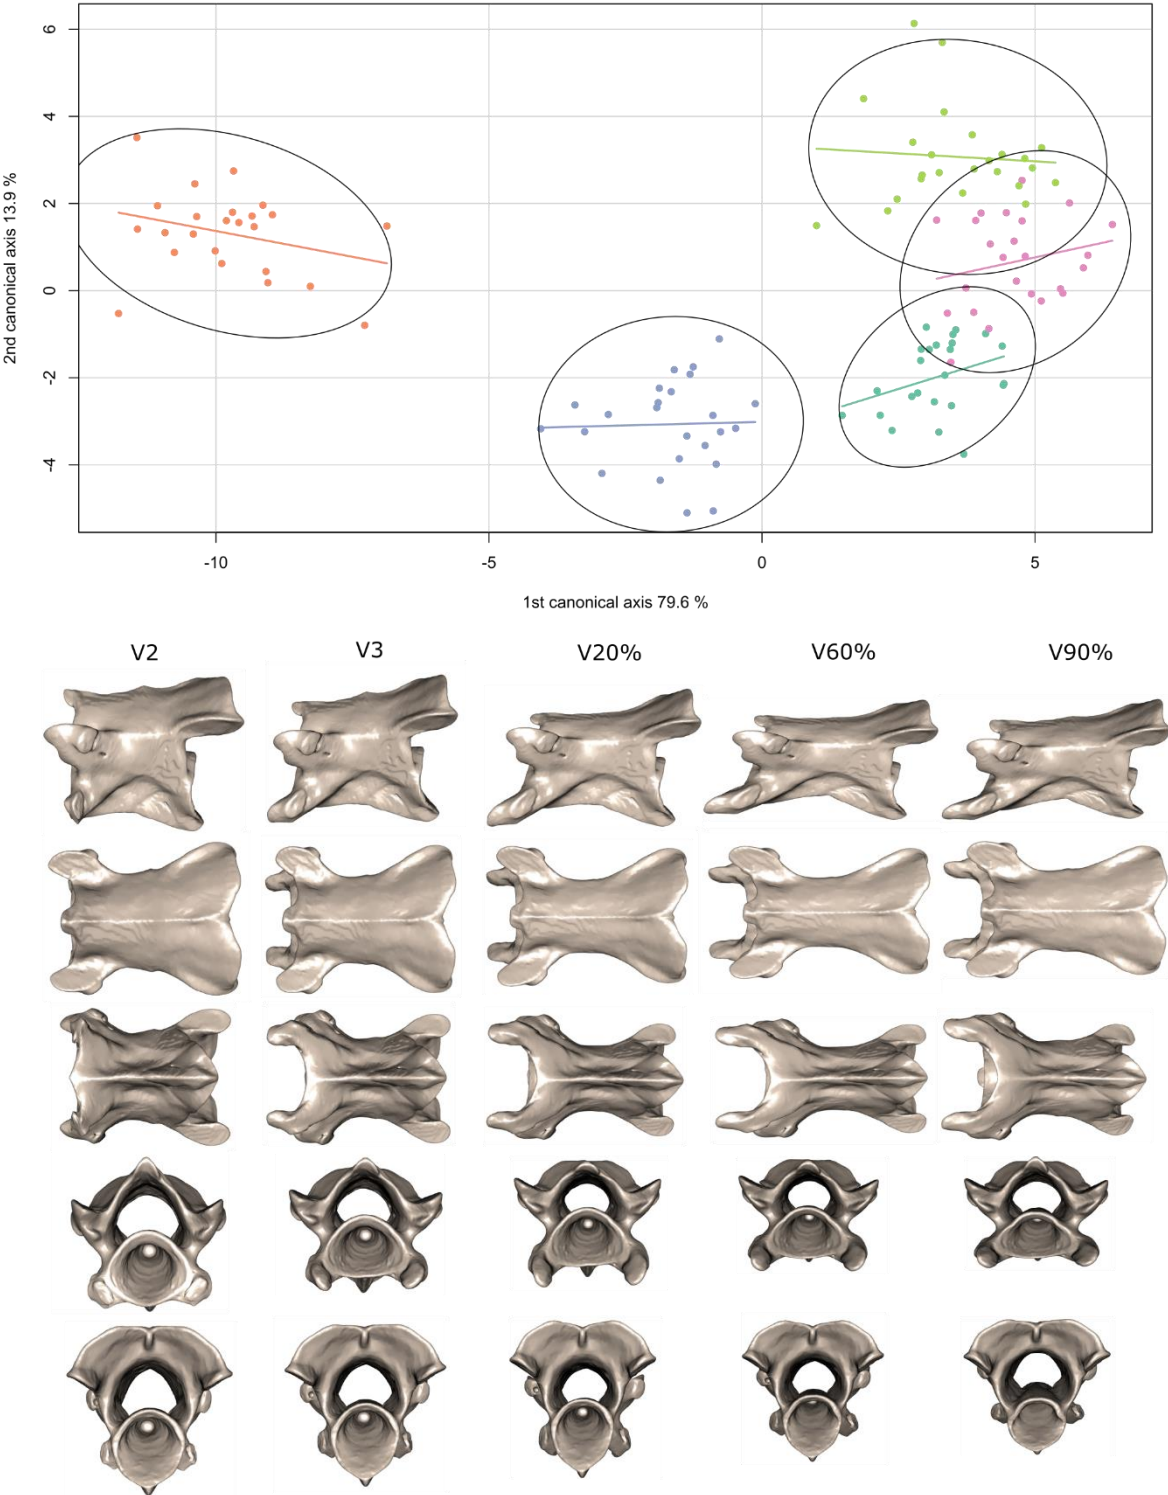

**A**

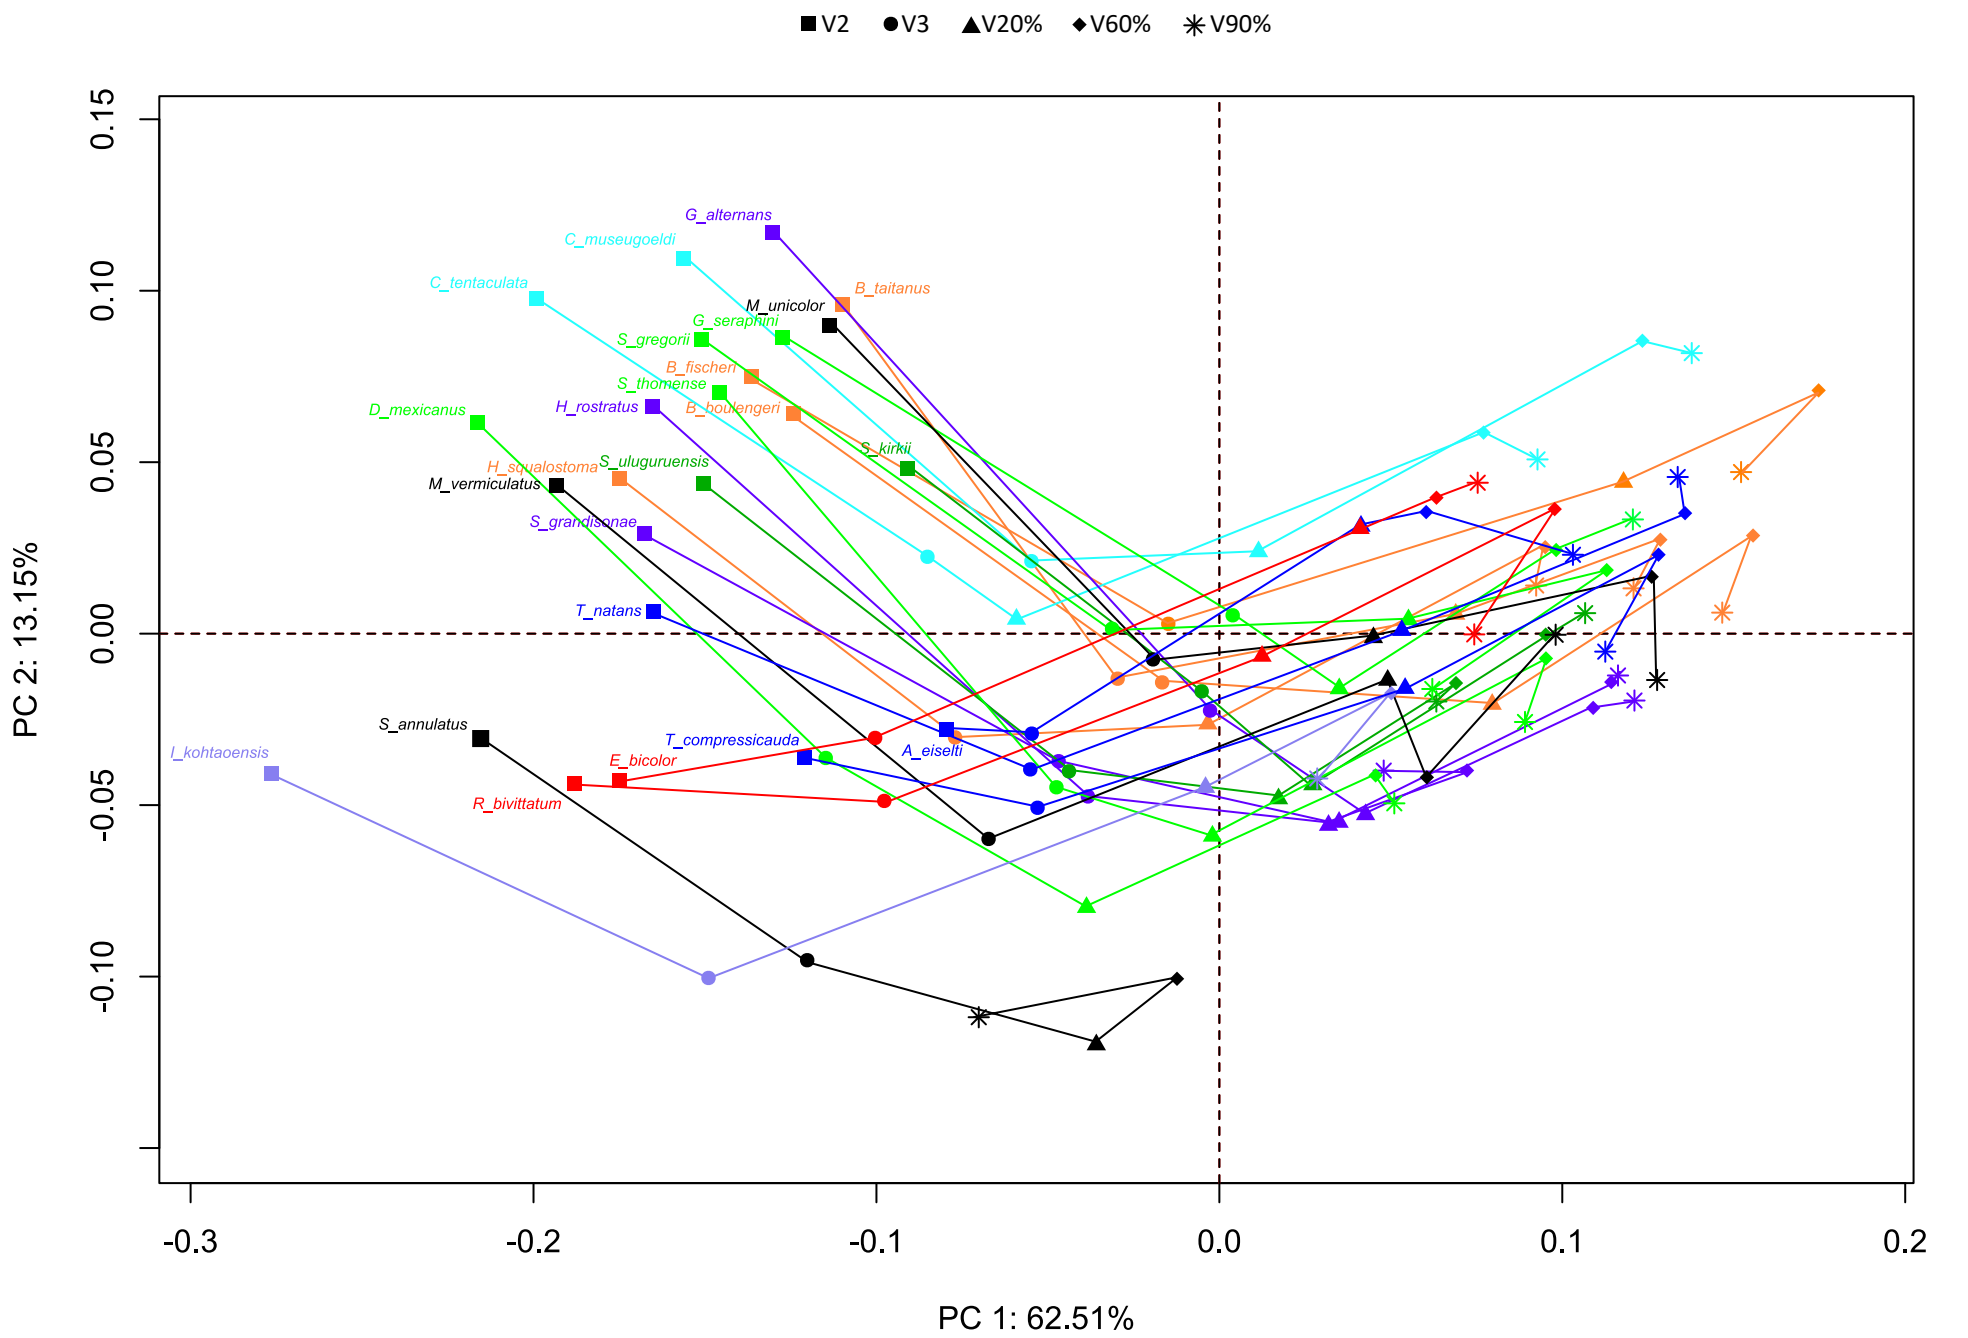

**B**

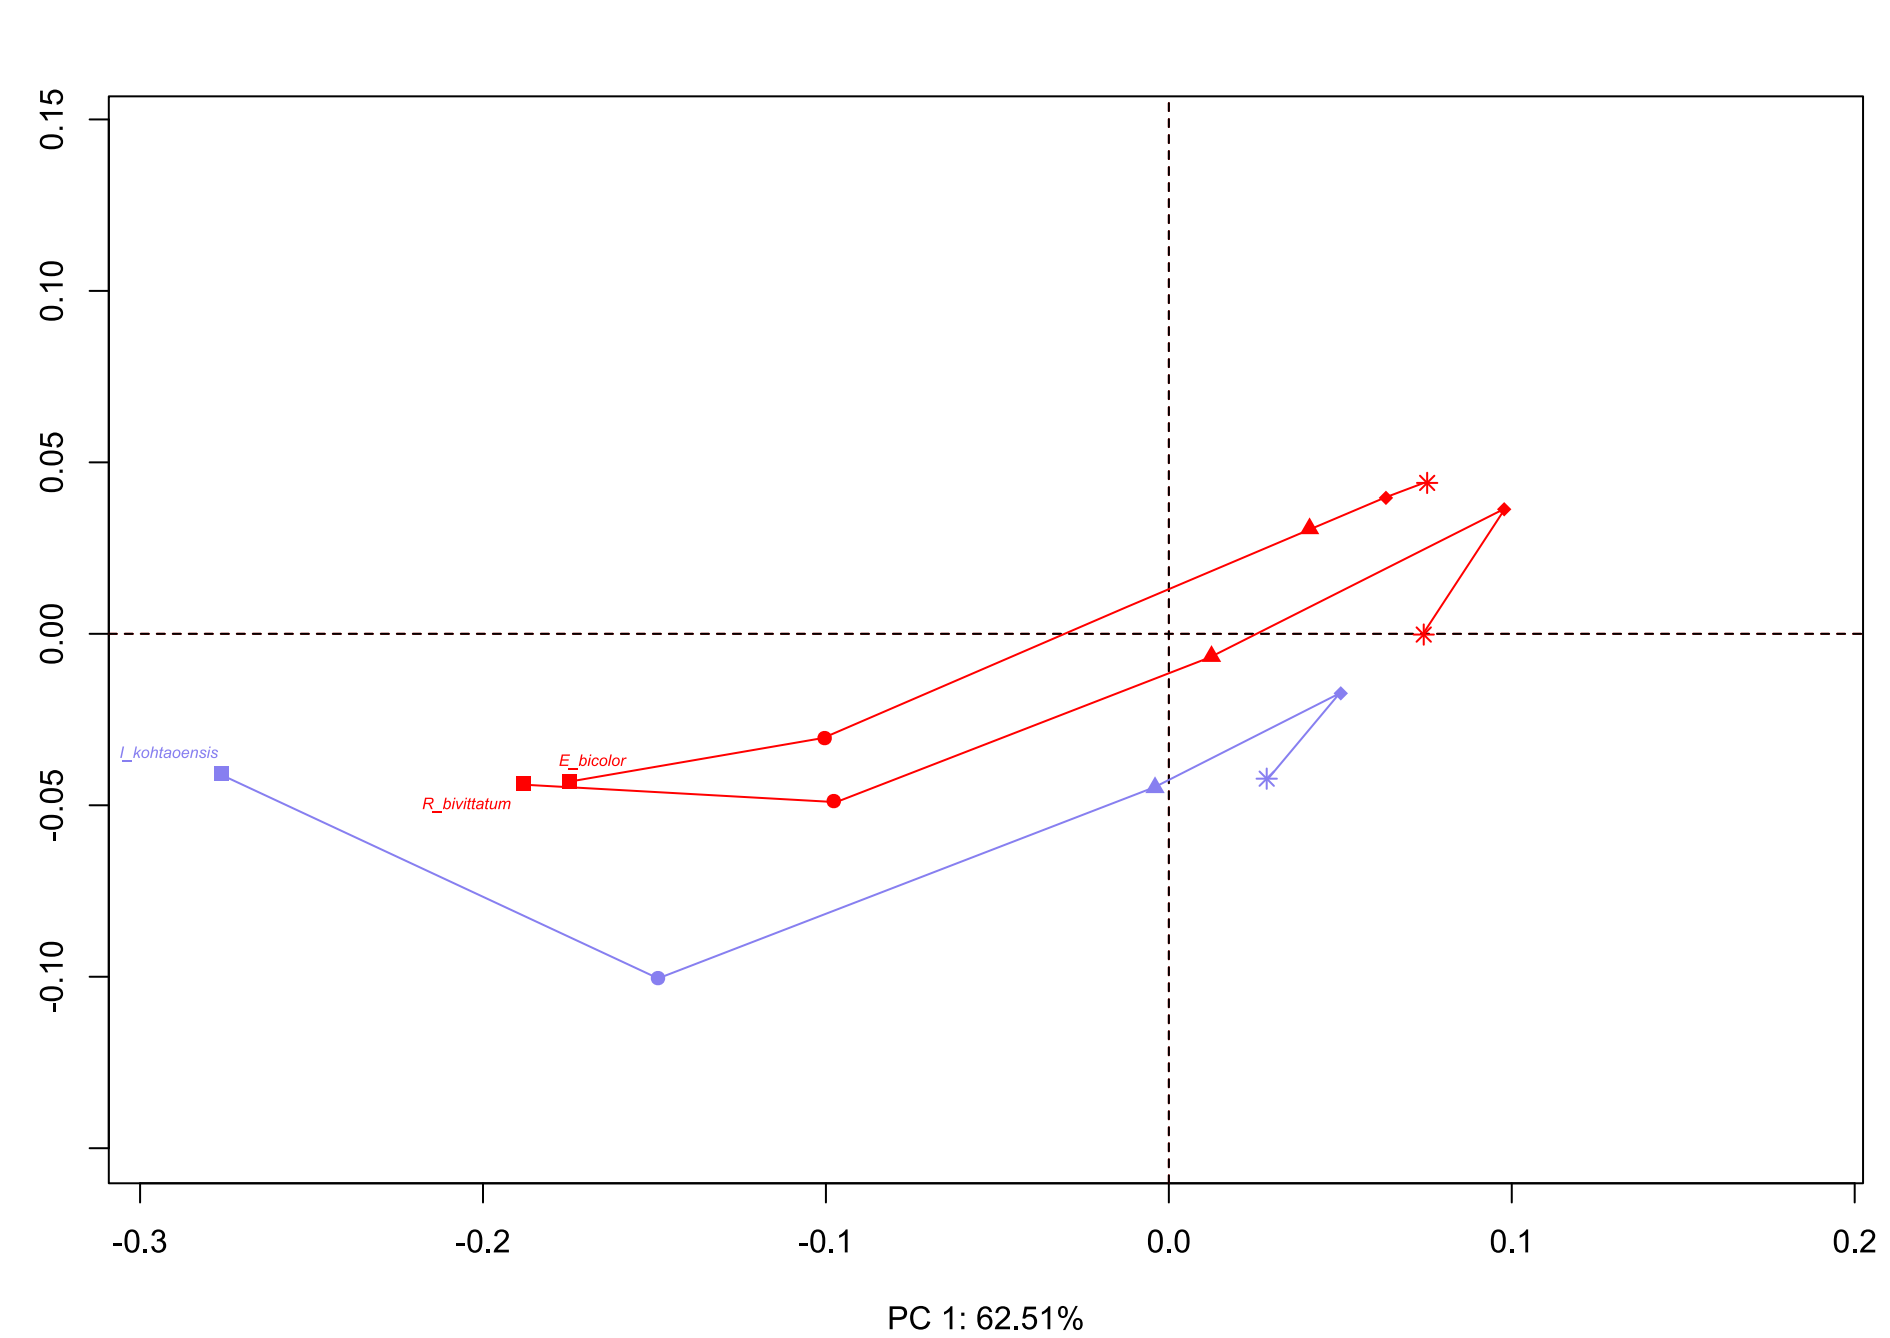

**C**

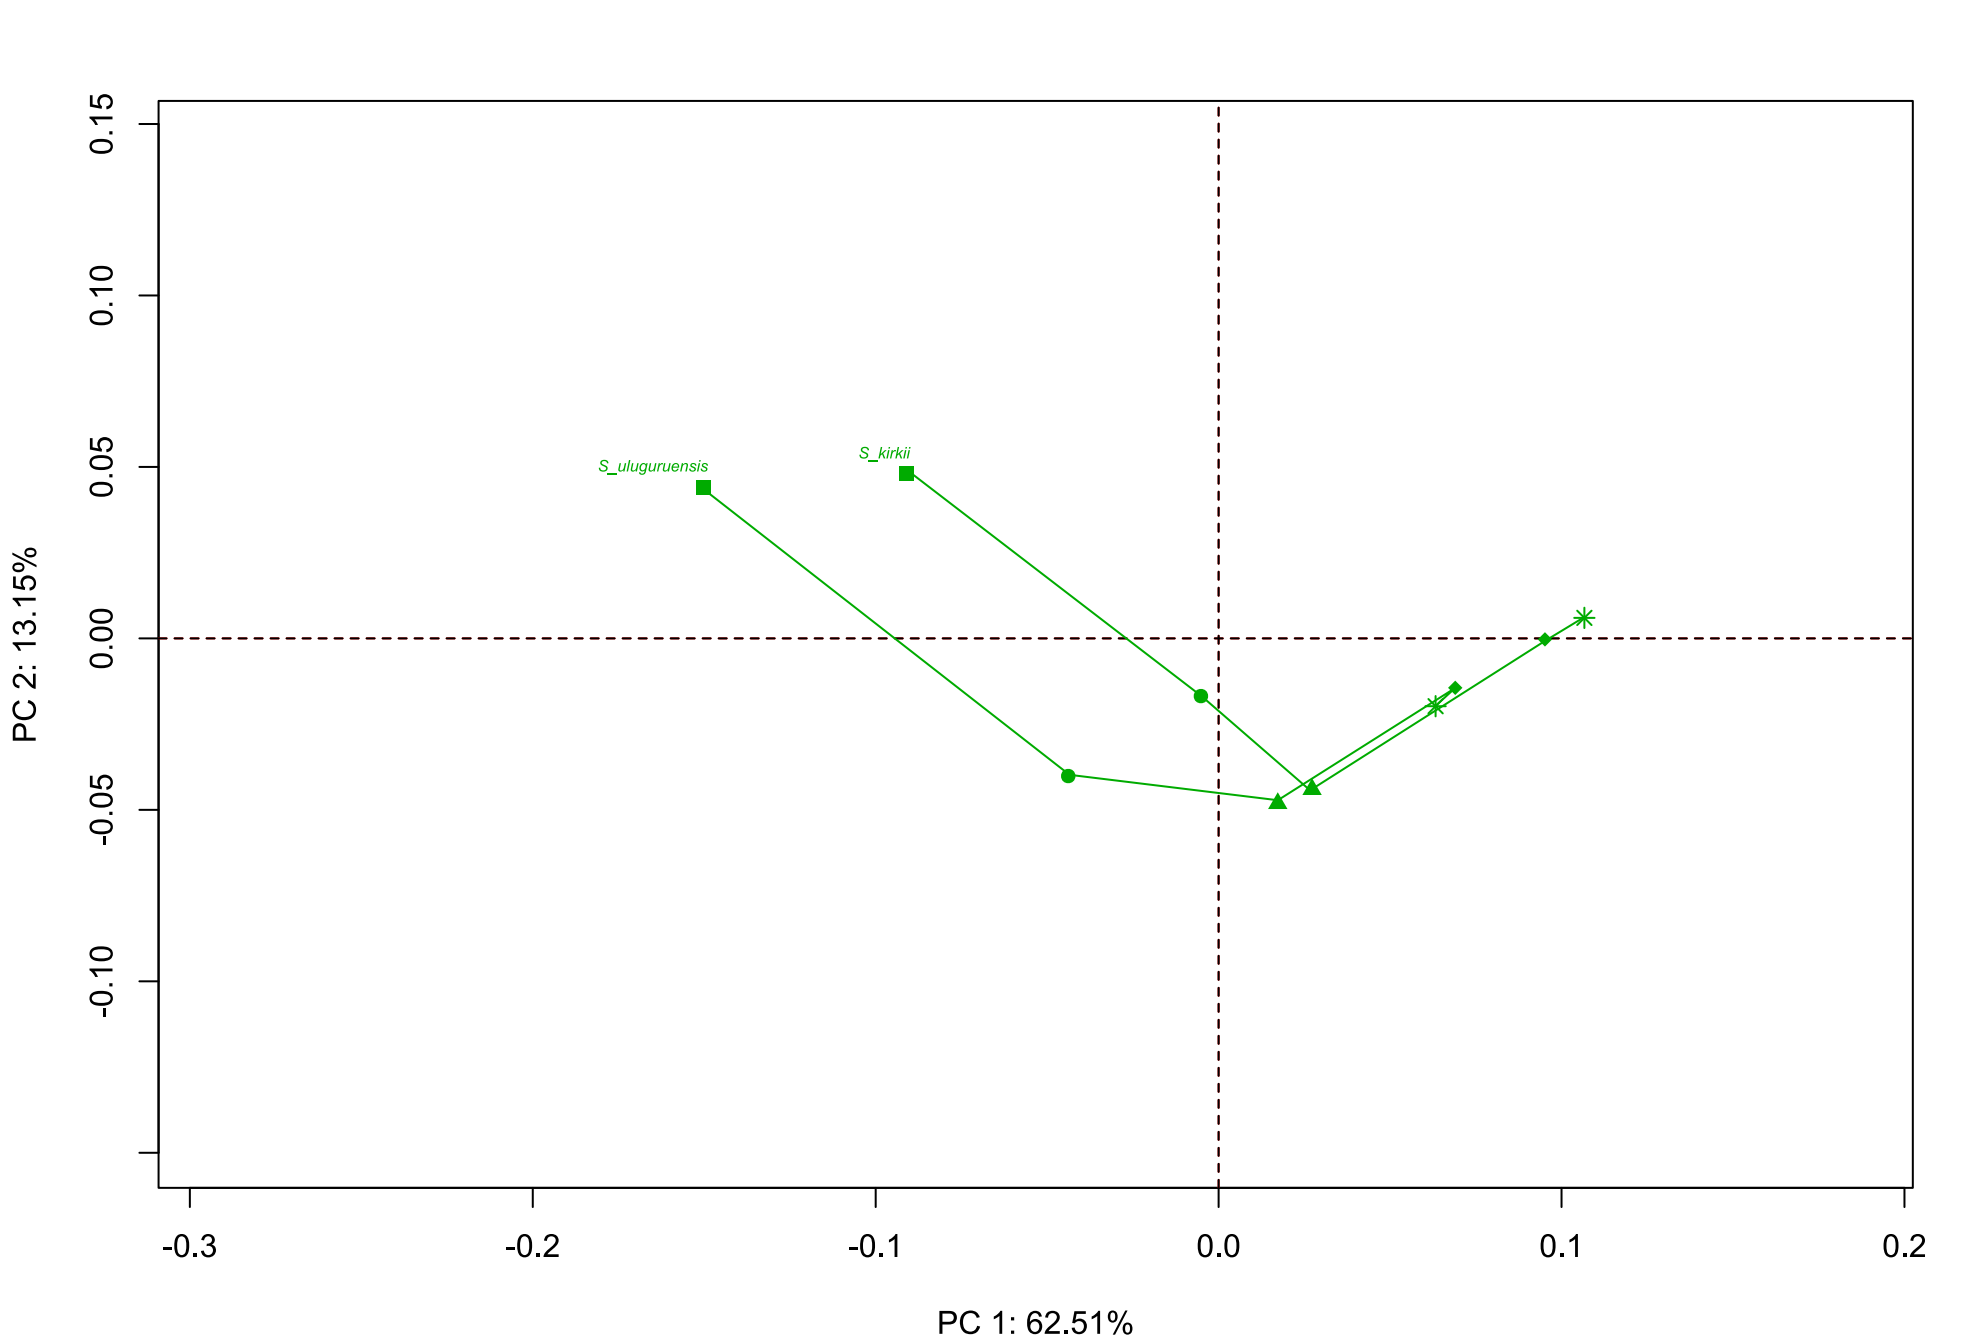

**D**

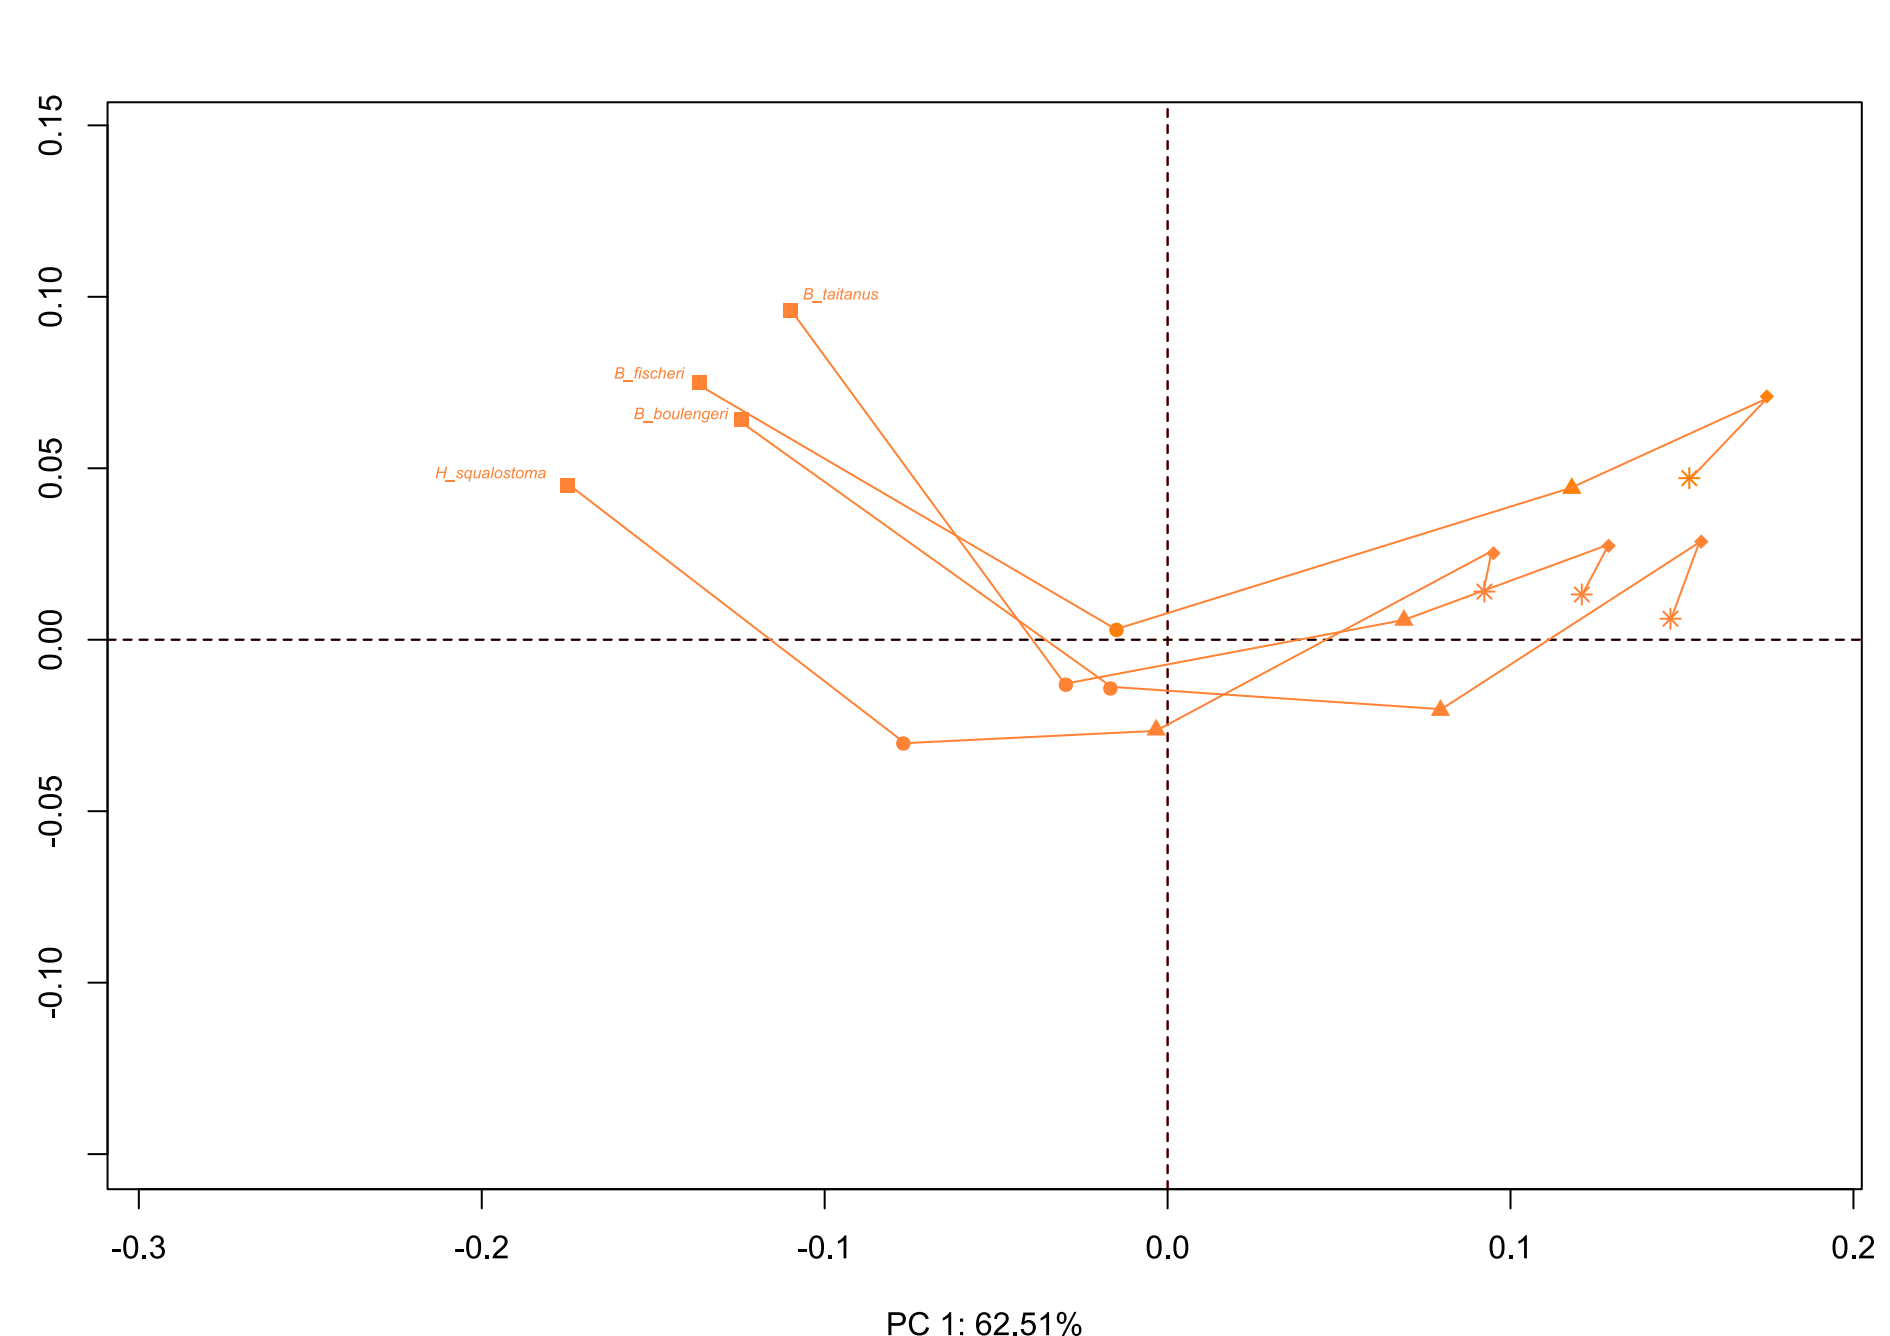



**E**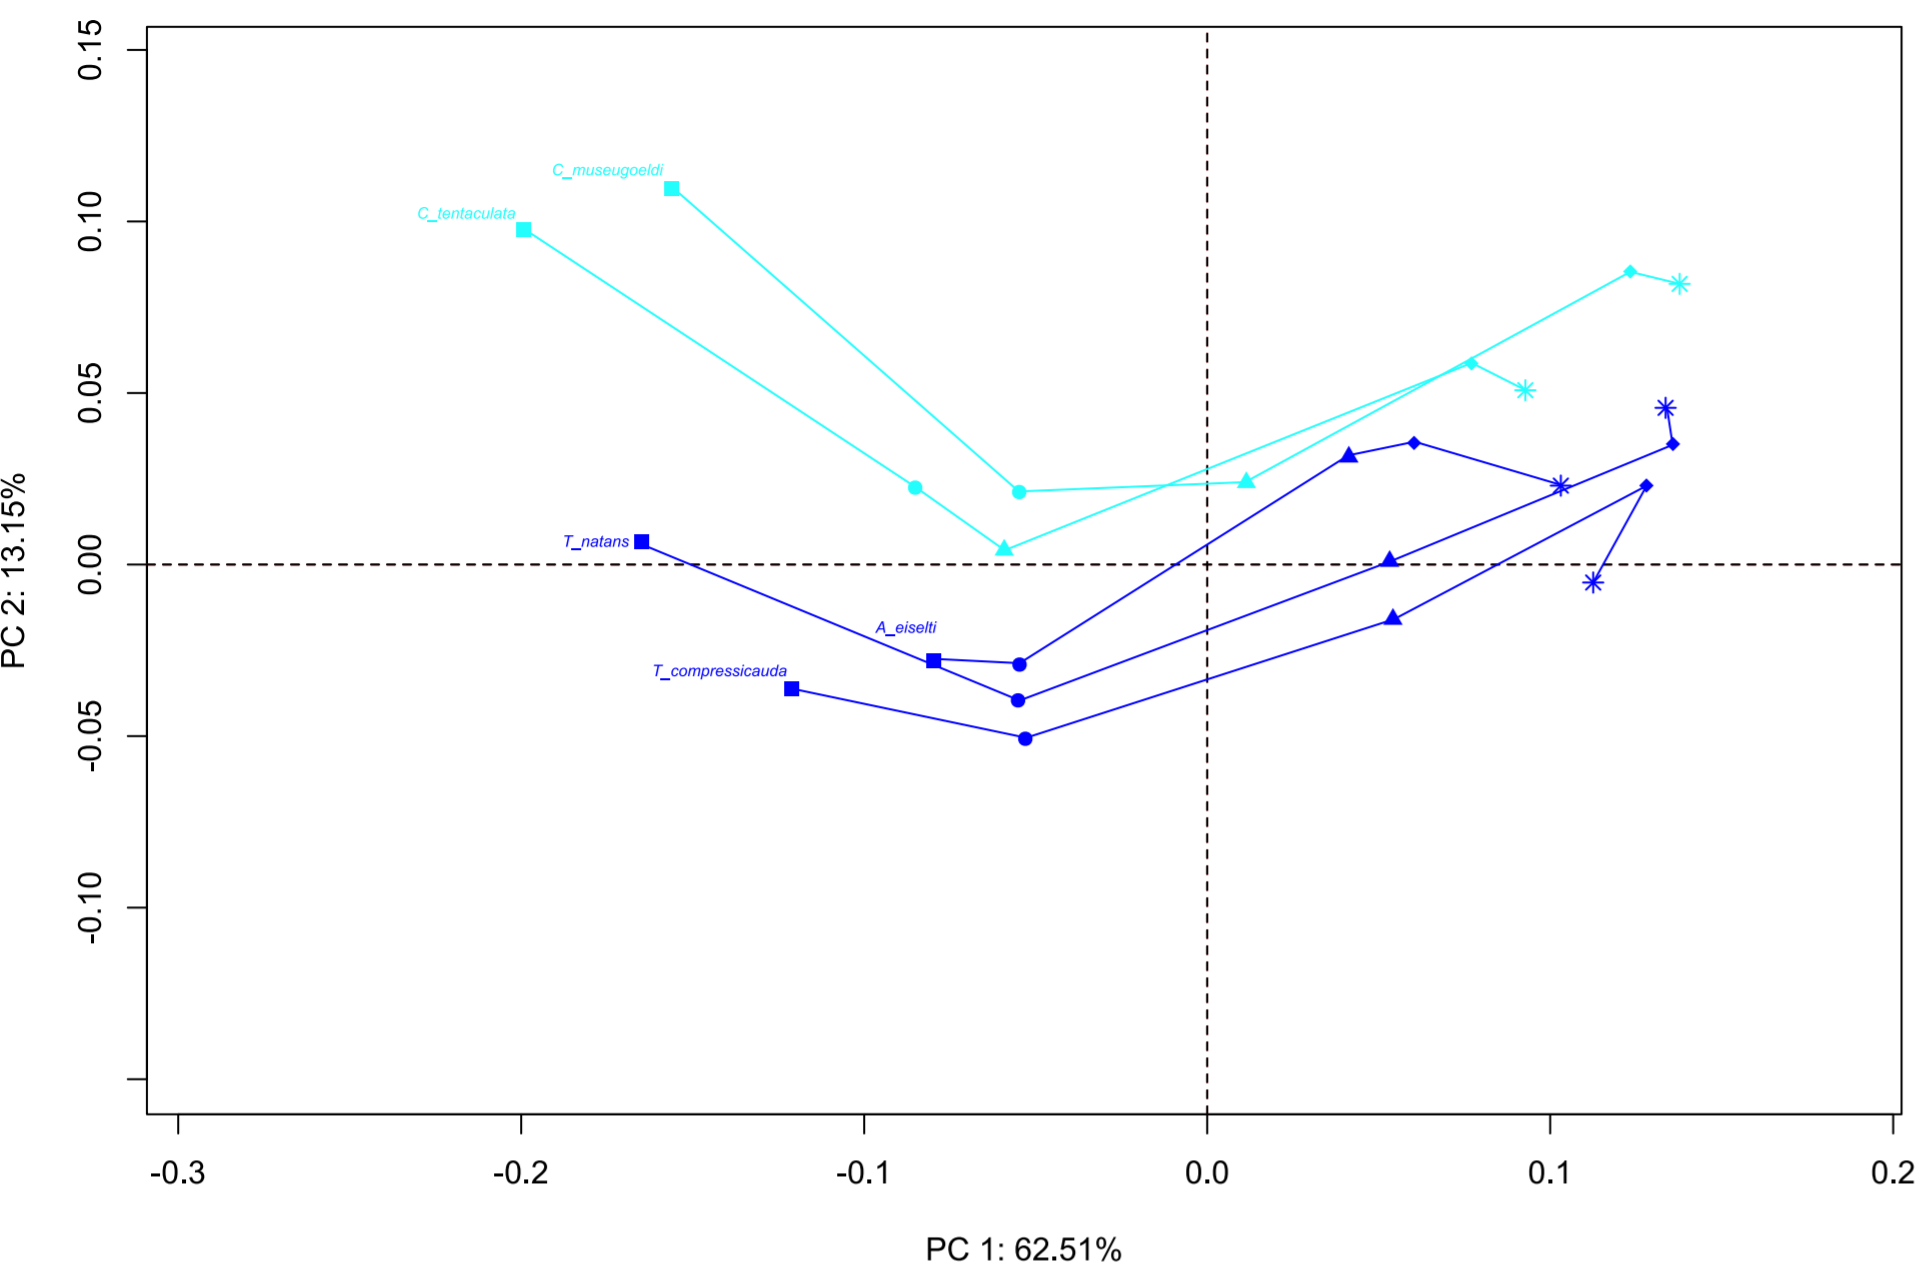**F**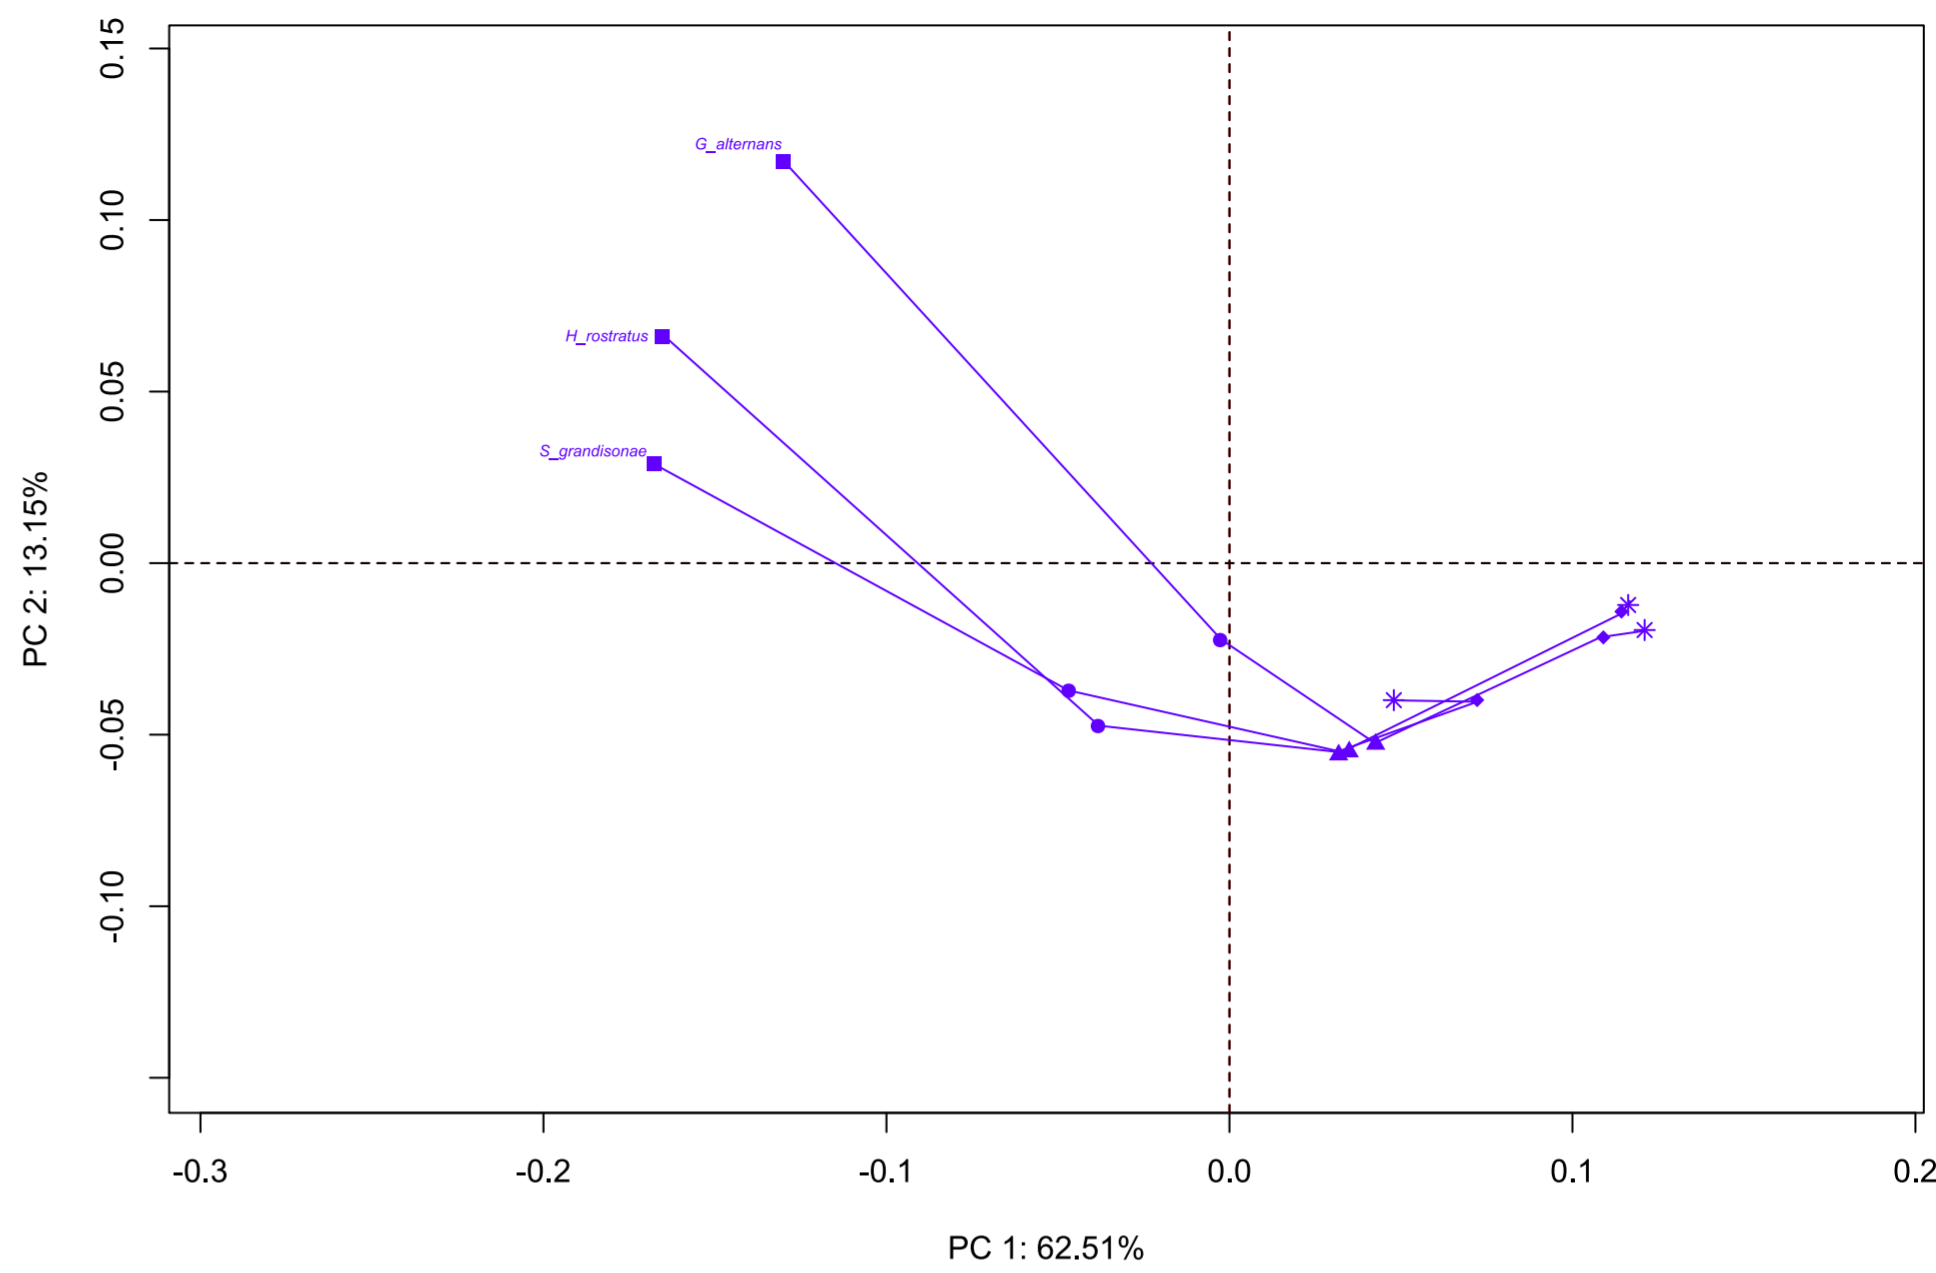**G**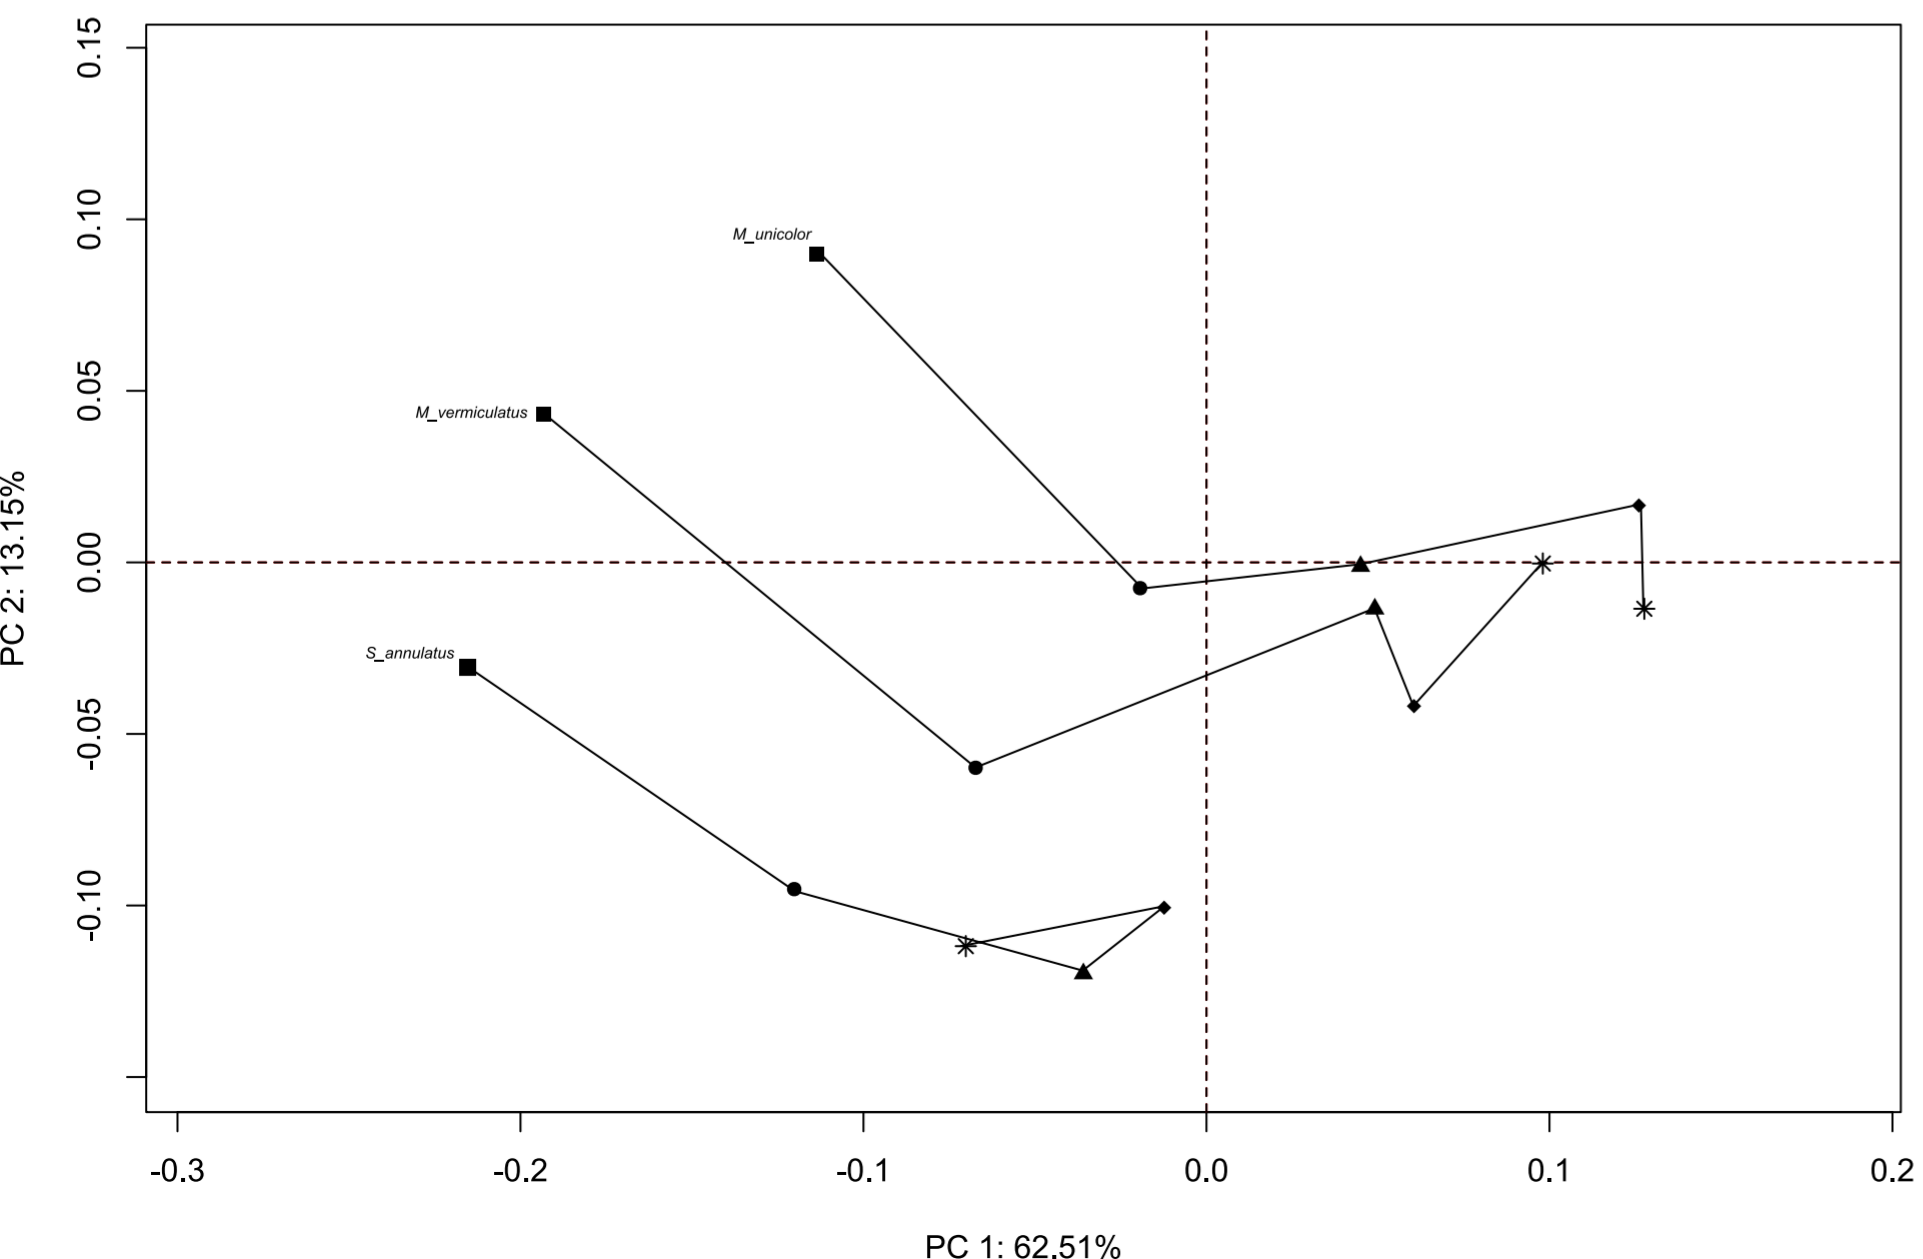**H**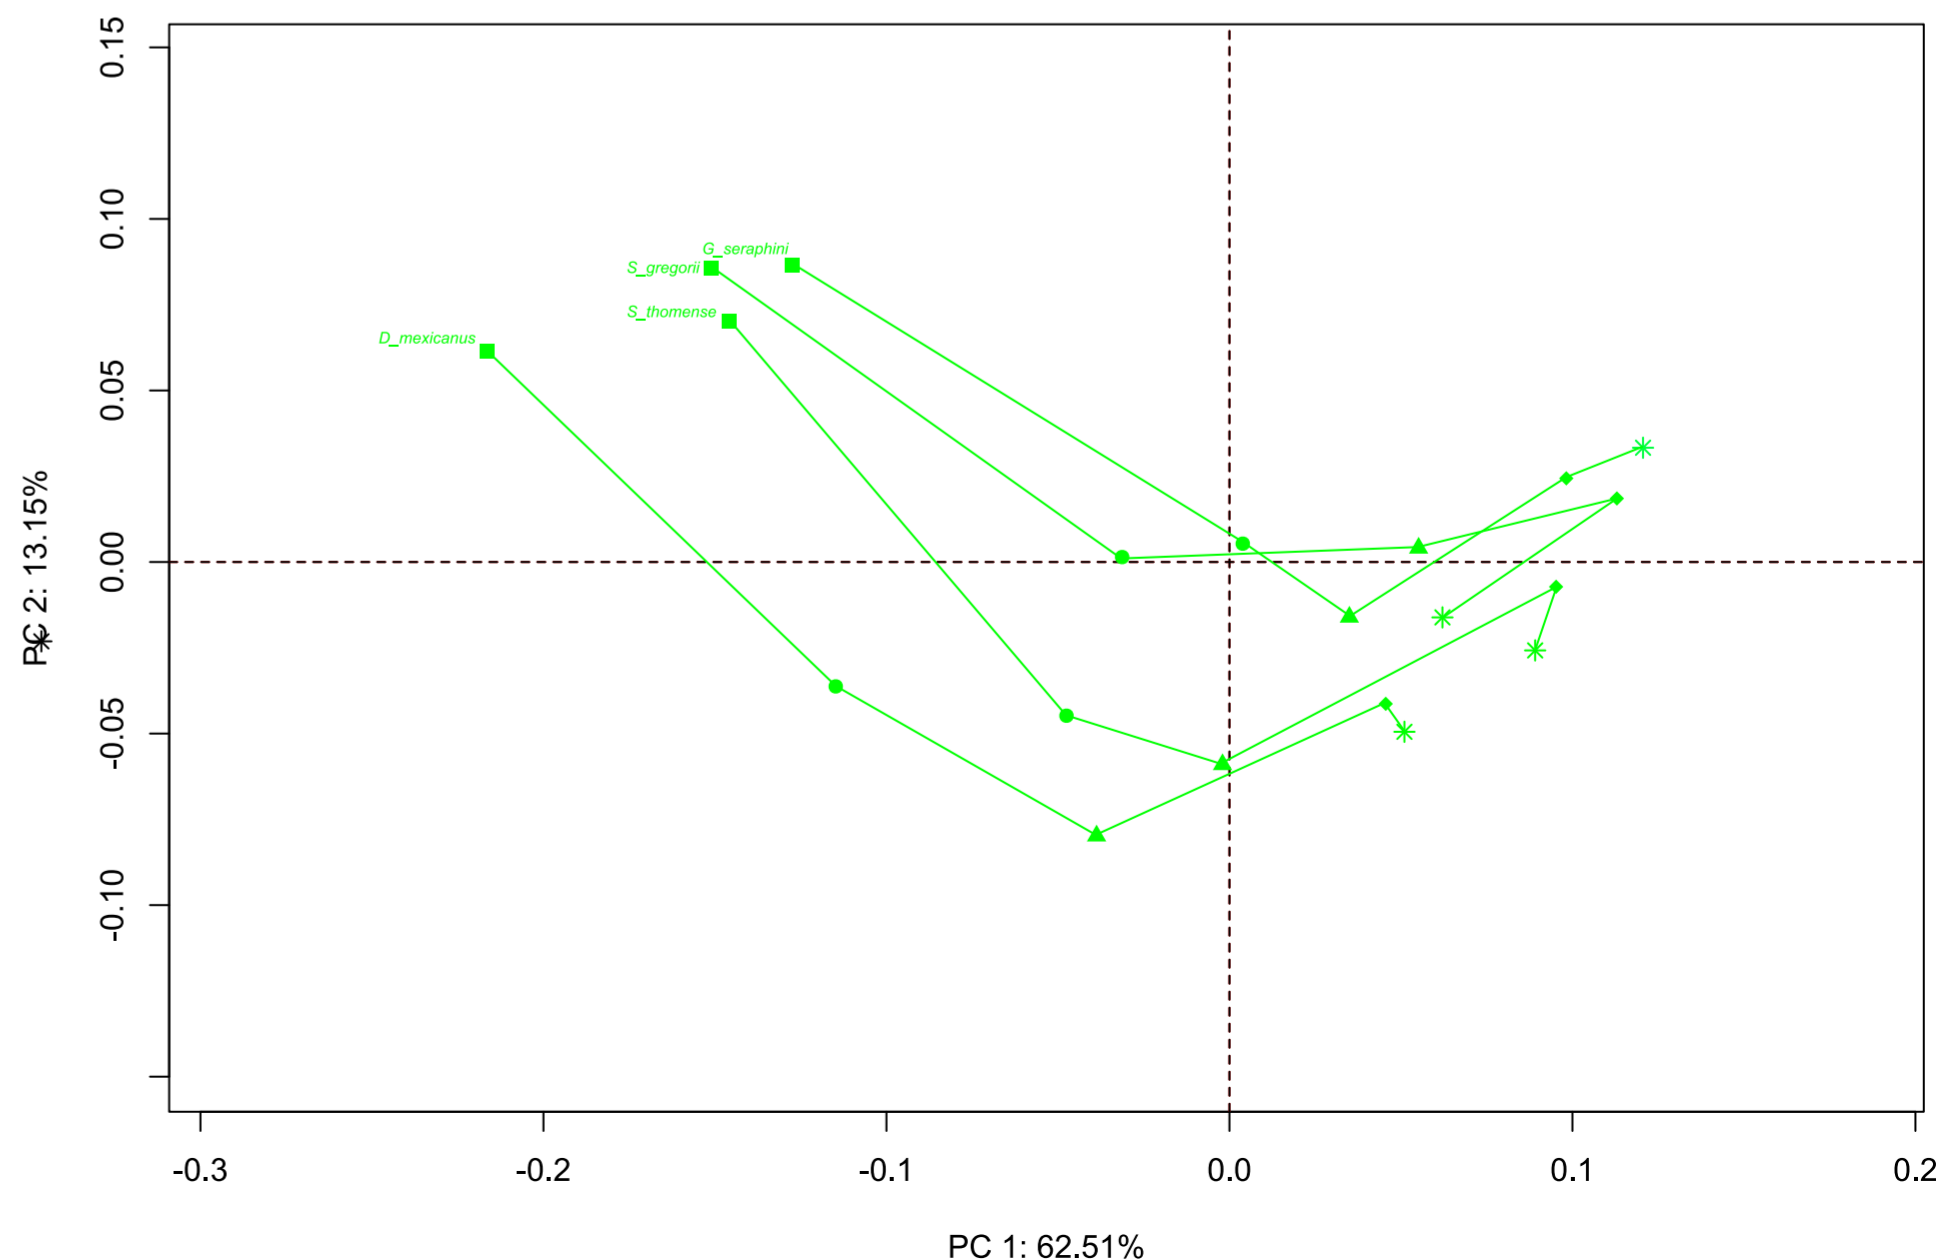

Supplement: JOA-241-716-s001.pdf [file JOA-241-716-s001.pdf]
